# Supplementary material for: NCN pincer palladium complexes based on 1,3-dipicolyl-3,4,5,6-tetrahydropyrimidin-2-ylidenes: synthesis, characterization and catalytic activities
Source: Royal Society of Chemistry journal article supplement (doi:10.1039/c5ra01706h), 2015-01-01

NMR spectra of compounds:

<sup>1</sup>H NMR of **1a**:

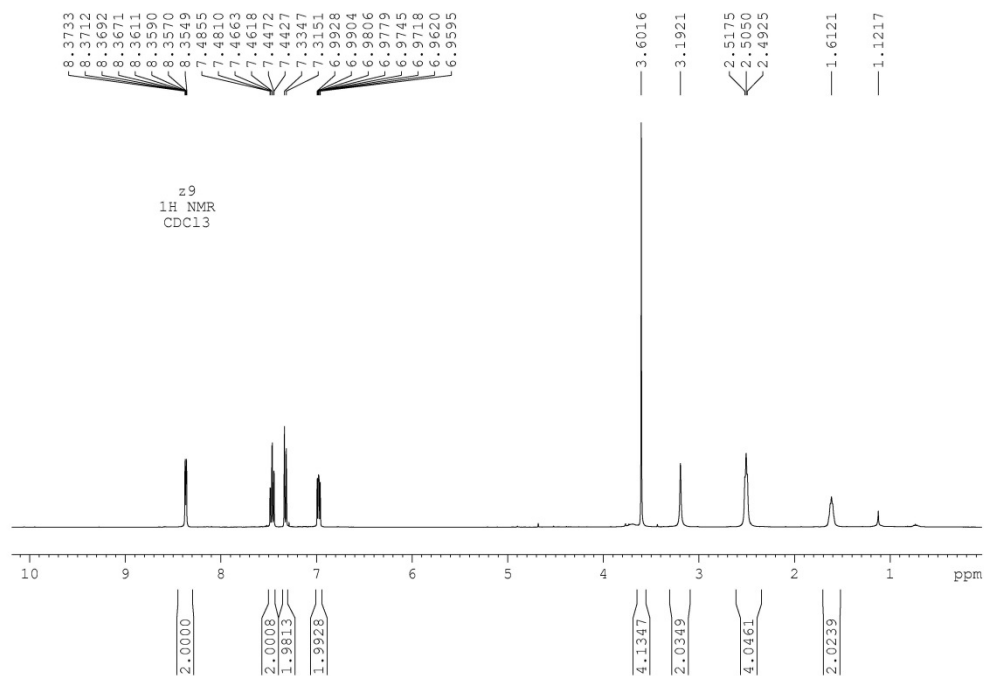

<sup>13</sup>C NMR of **1a**:

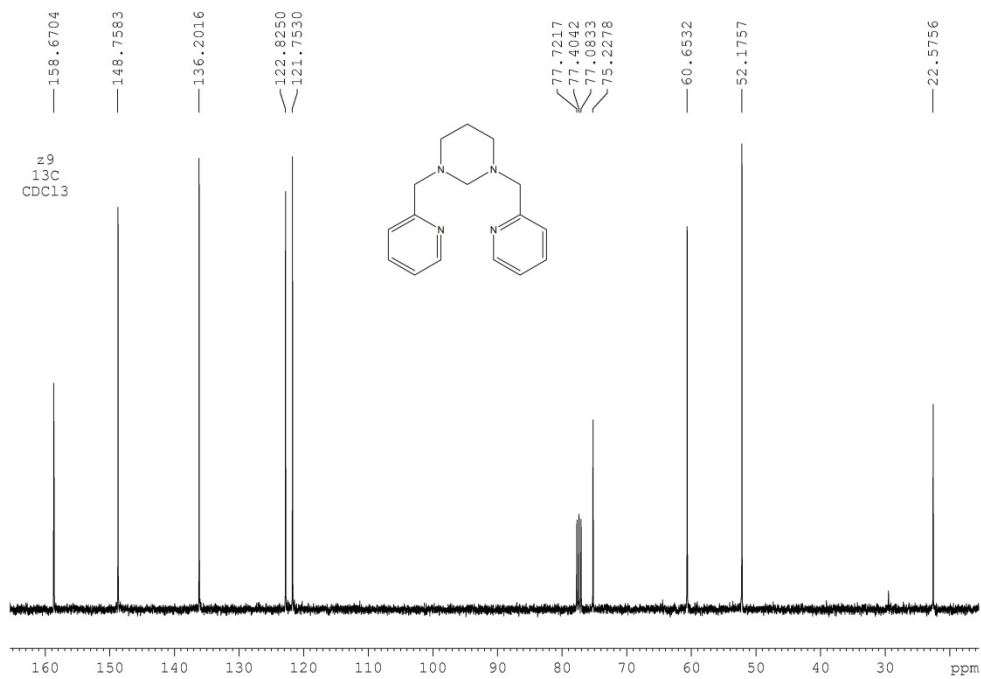

### <sup>1</sup>H NMR of **1b**:

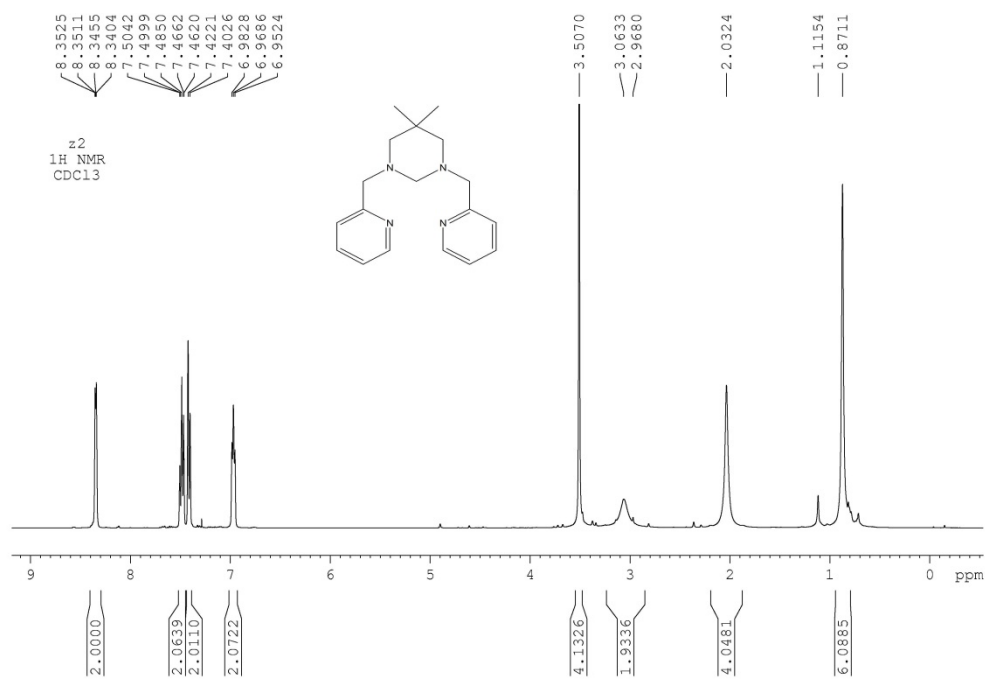

### <sup>13</sup>C NMR of **1b**:

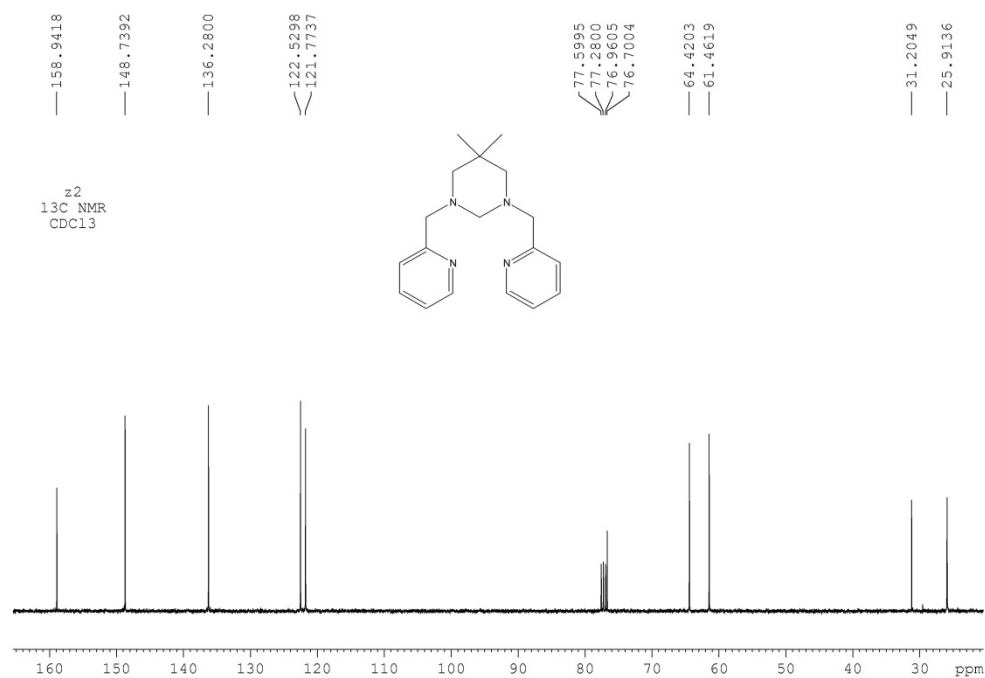

<sup>1</sup>H NMR of **2a**:

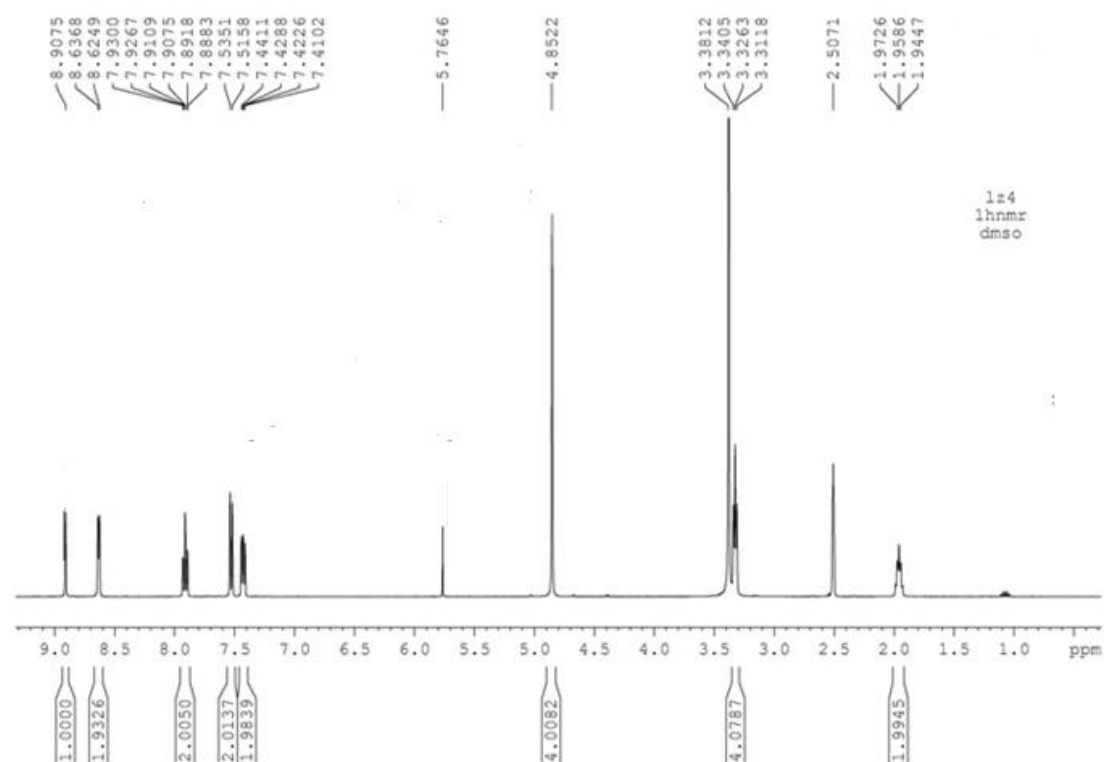

<sup>13</sup>C NMR of **2a**:

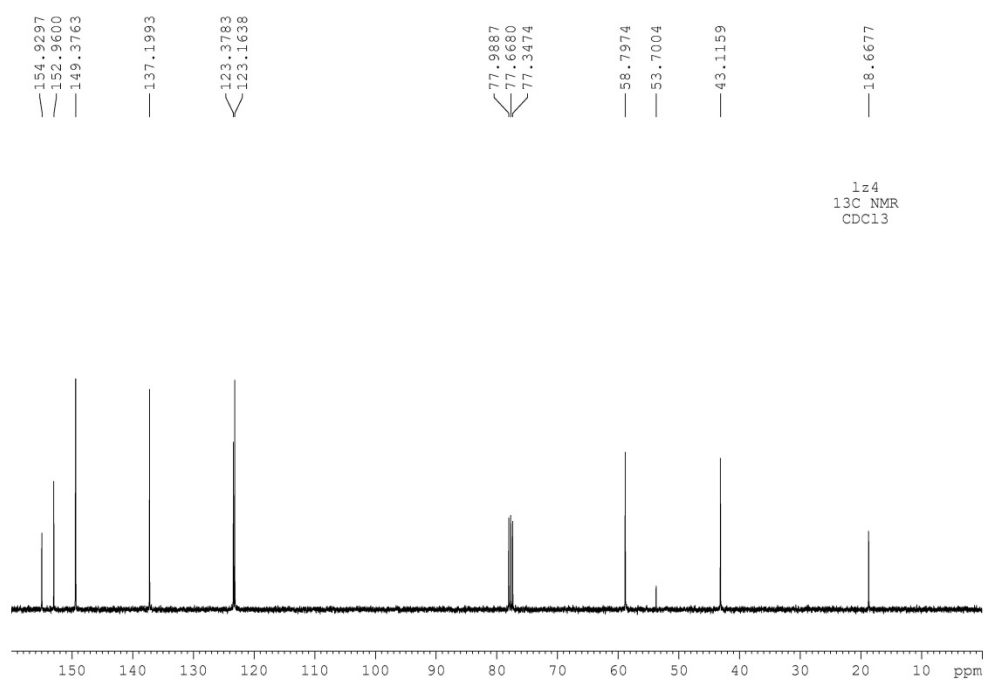

### <sup>1</sup>H NMR of **2b**:

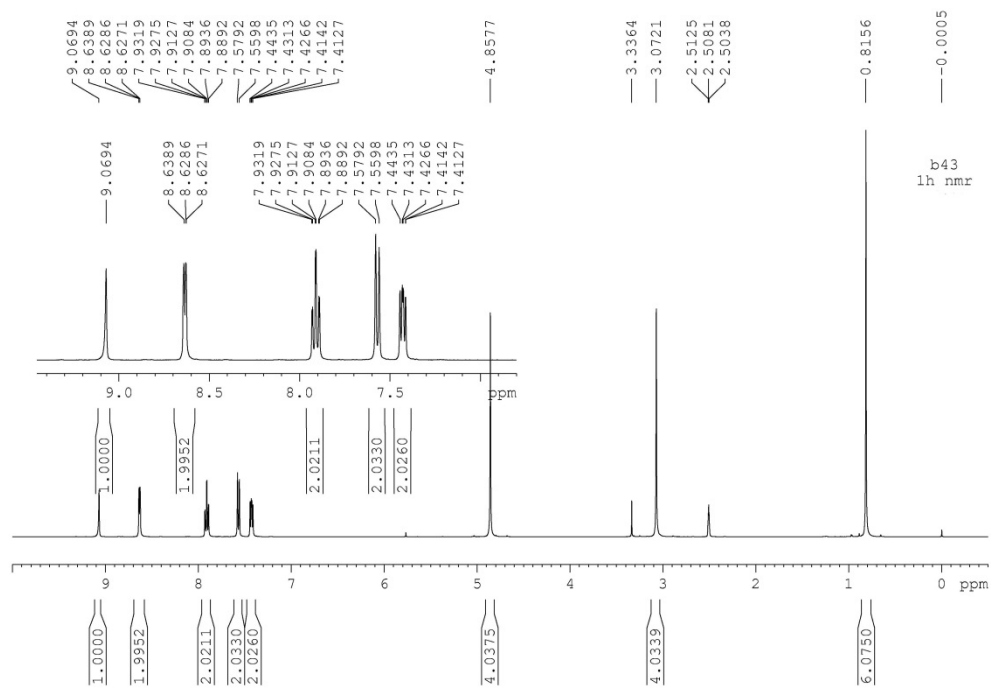

### <sup>13</sup>C NMR of **2b**:

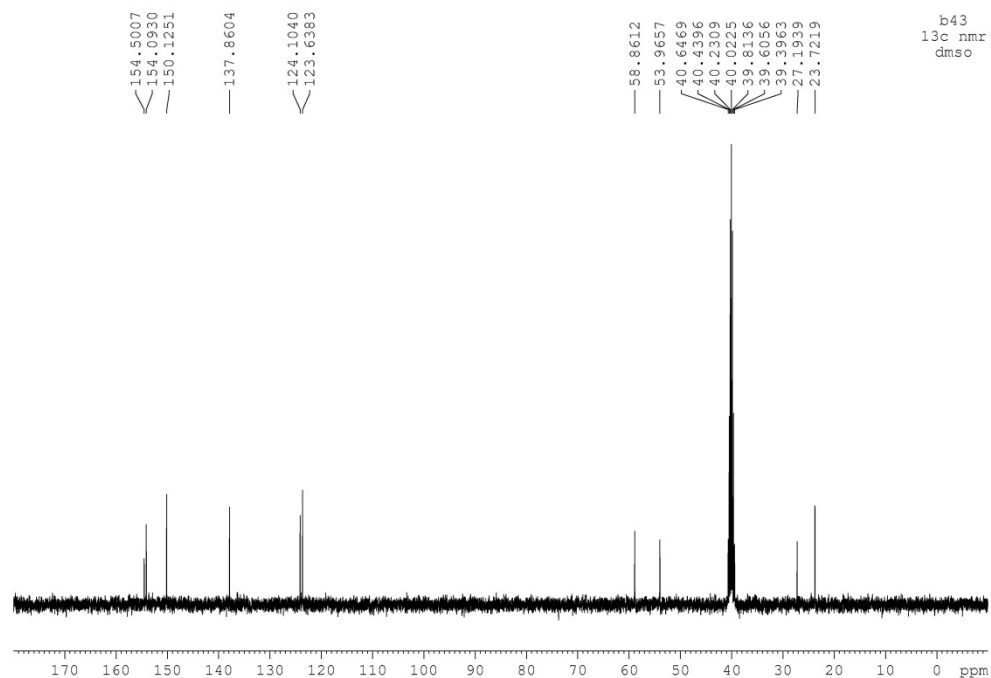

<sup>1</sup>H NMR of **3a**:

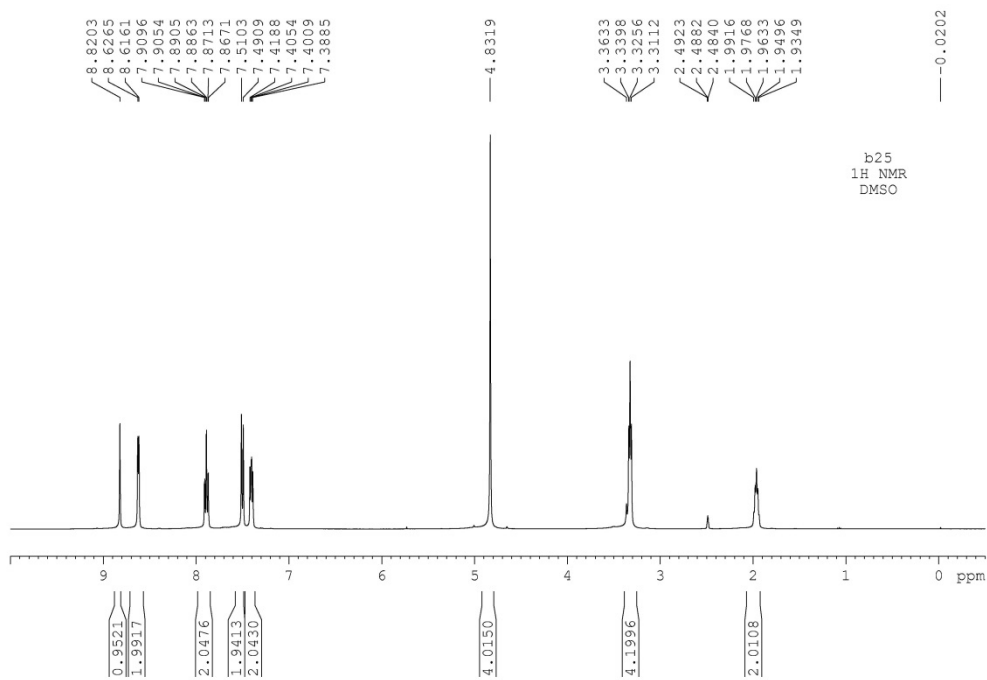

<sup>13</sup>C NMR of **3a**:

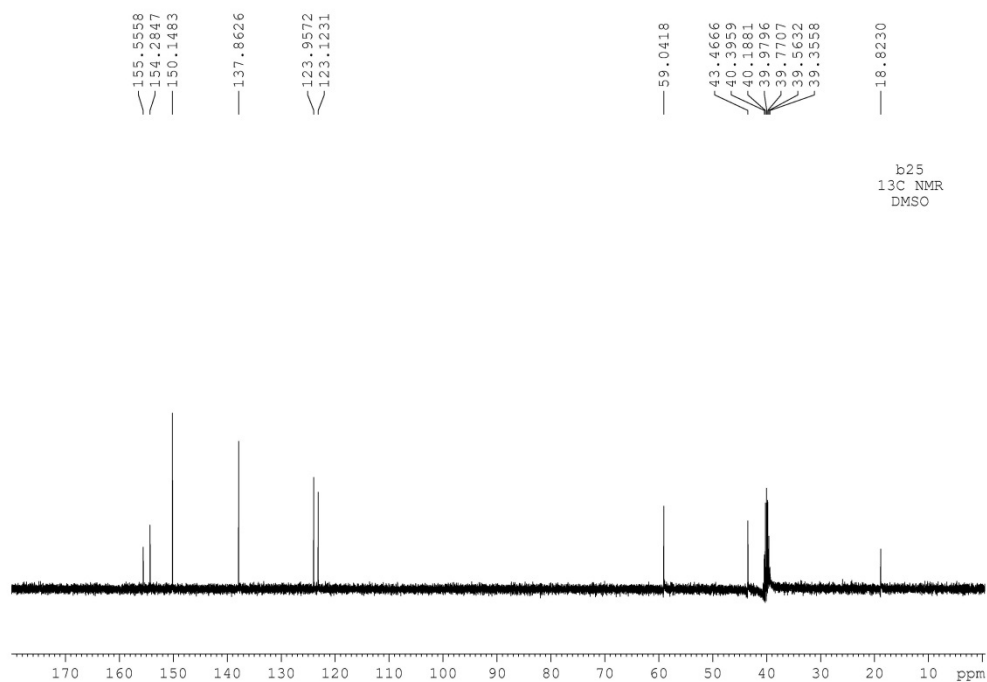

<sup>1</sup>H NMR of **3b**:

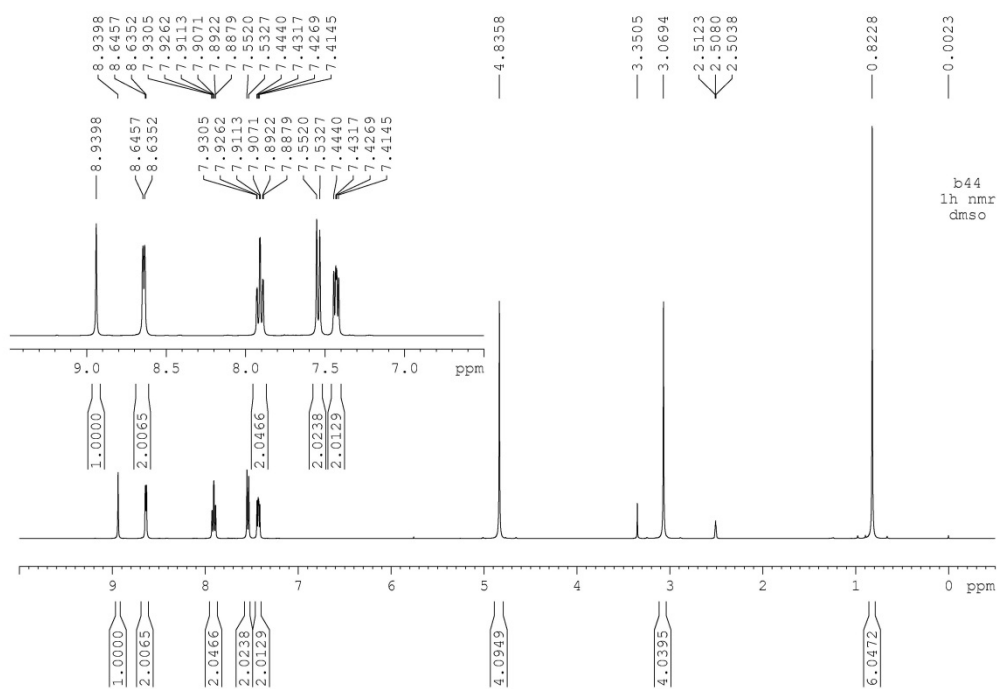

<sup>13</sup>C NMR of **3b**:

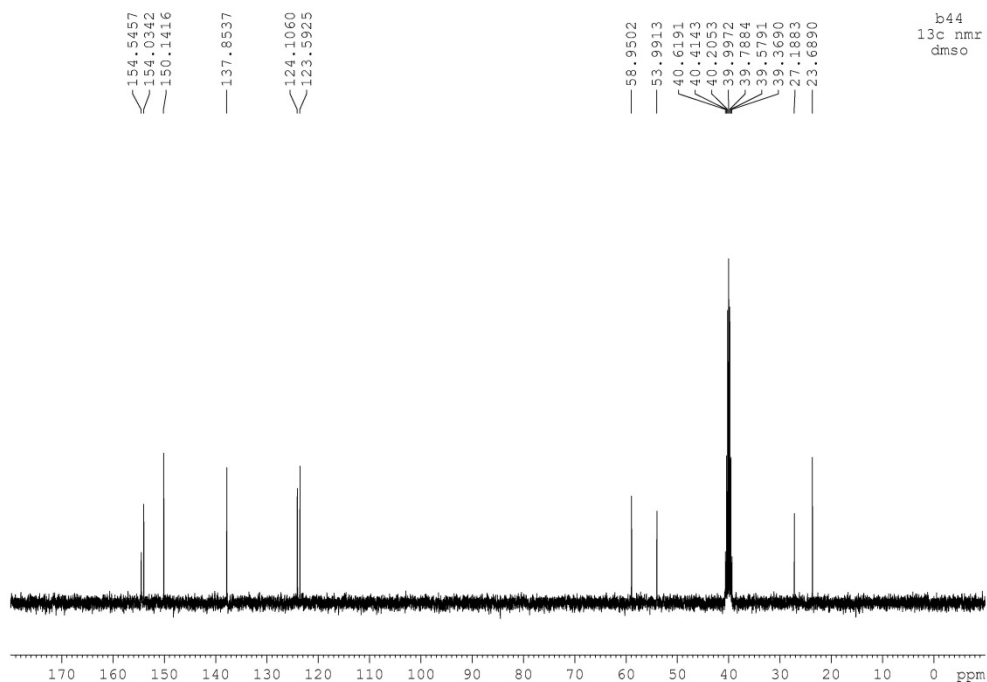

### <sup>1</sup>H NMR of 4a:

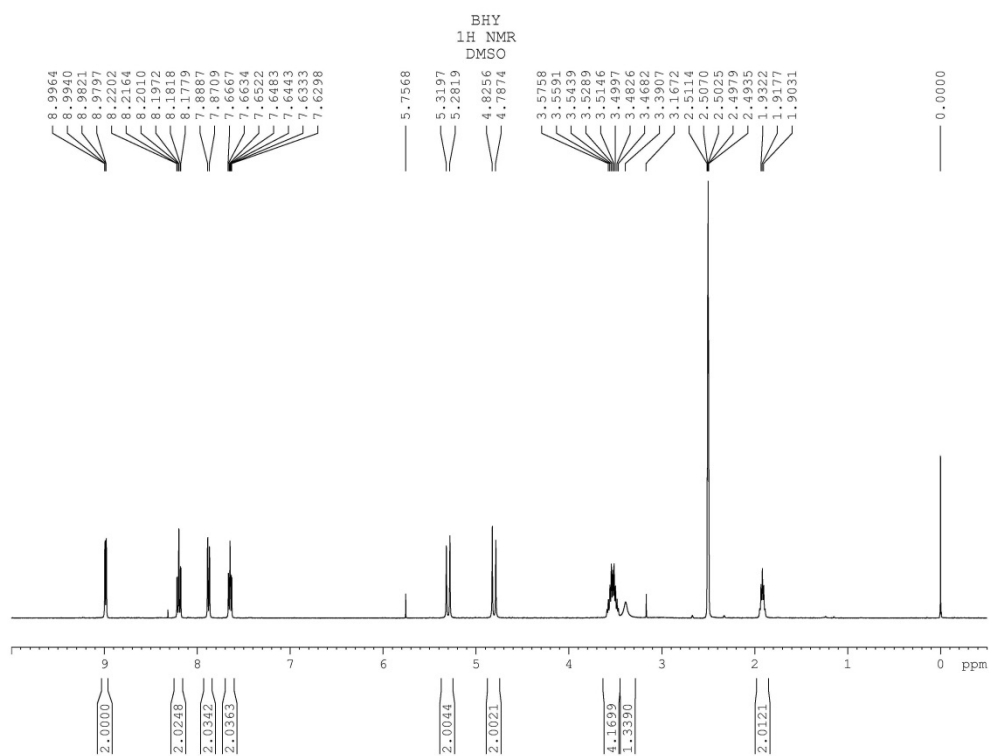

### <sup>13</sup>C NMR of 4a:

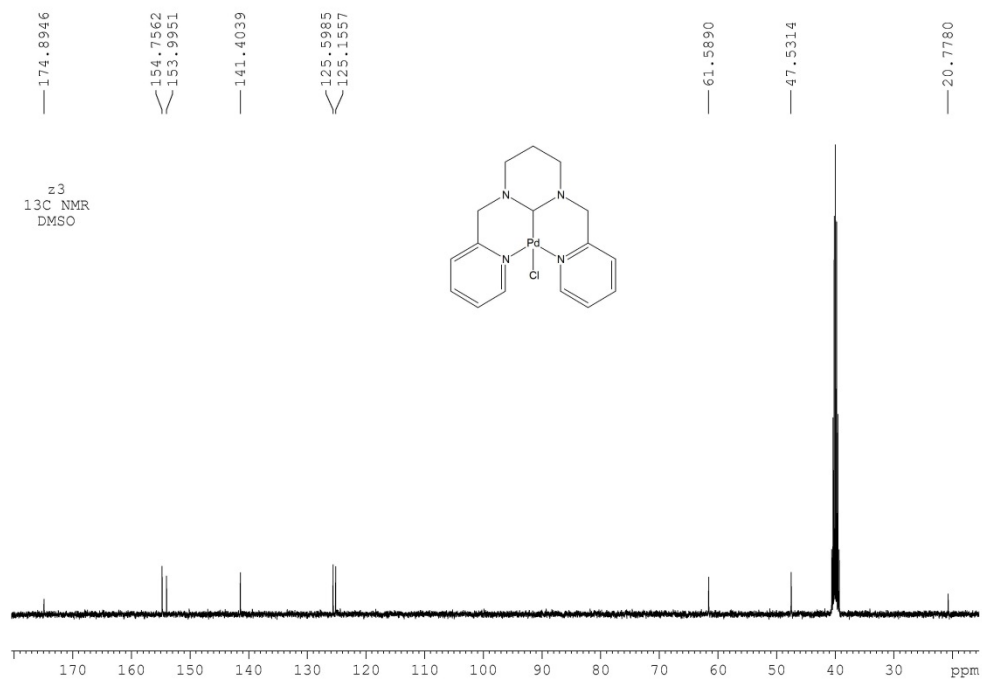

### <sup>1</sup>H NMR of **4b**:

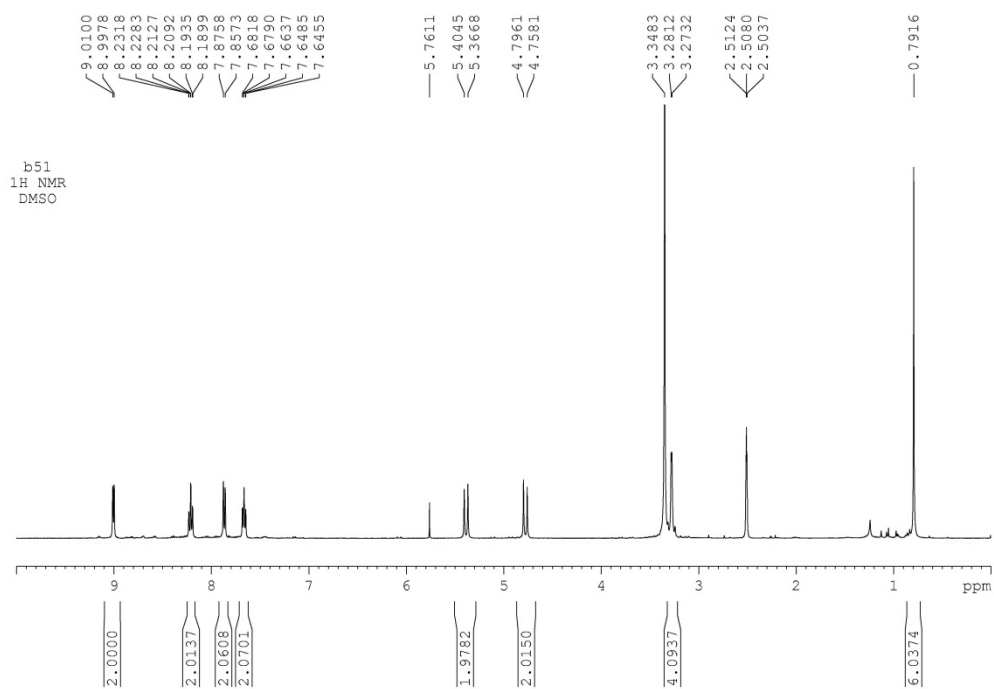

### <sup>13</sup>C NMR of **4b**:

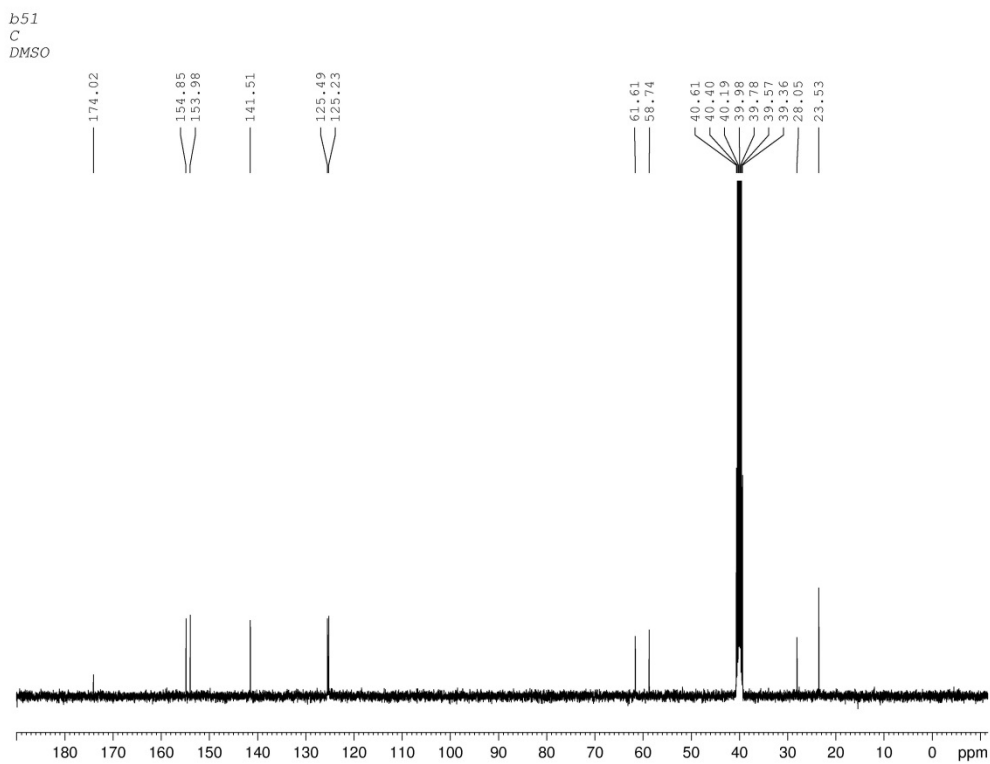



### DEPT 135 NMR of **4b**:

b51  
dept 135  
DMSO

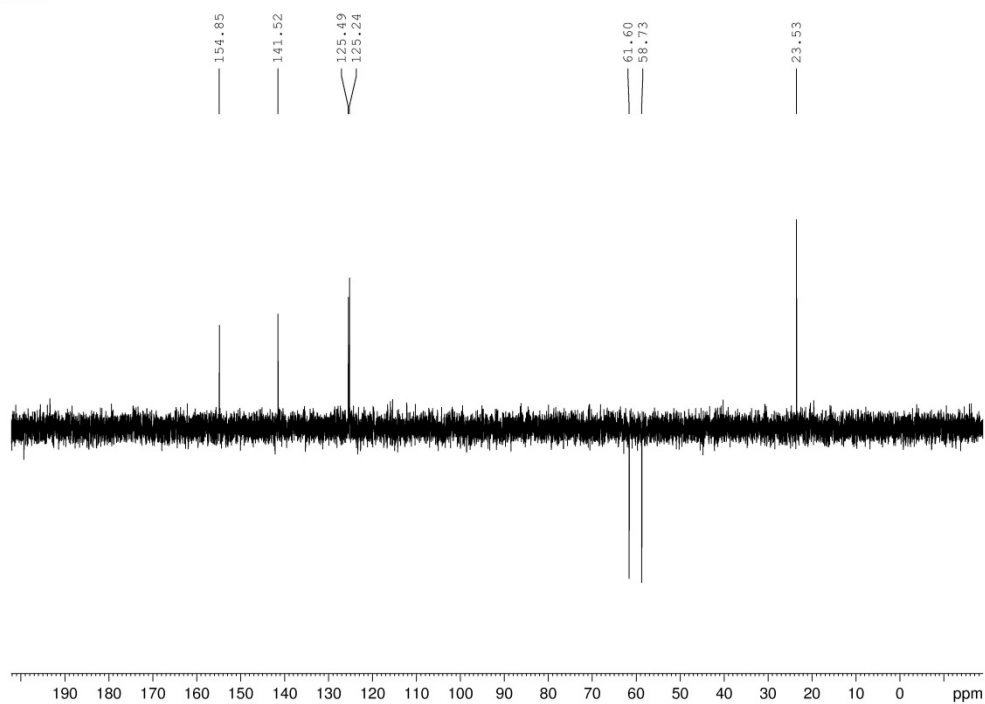

### HSQC NMR of **4b**:

b51  
hsqc  
DMSO

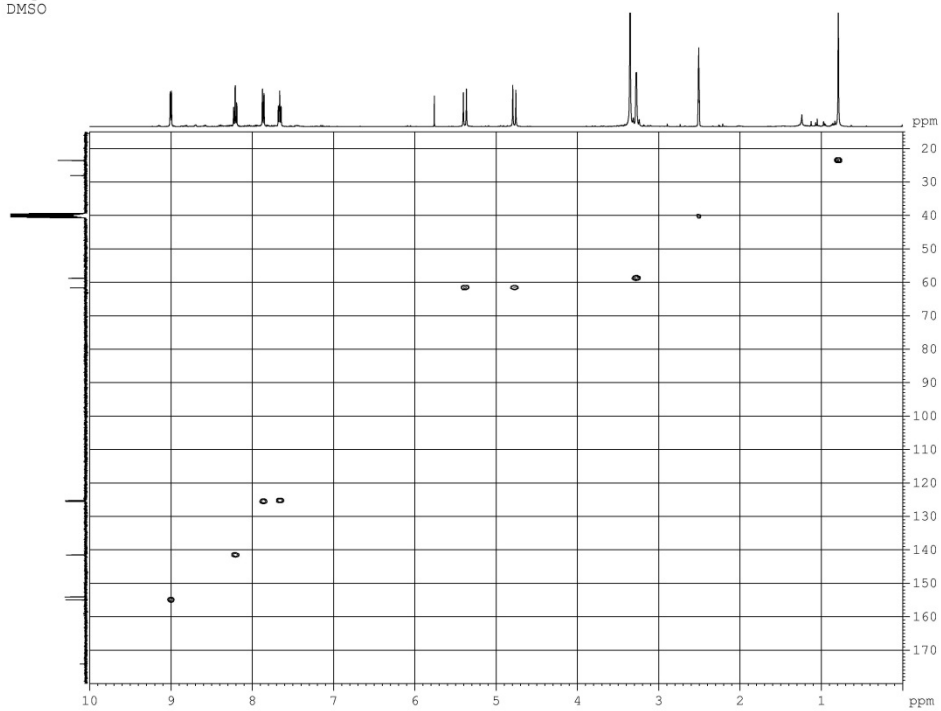

COSY NMR of **4b**:

b51  
cosy  
DMSO

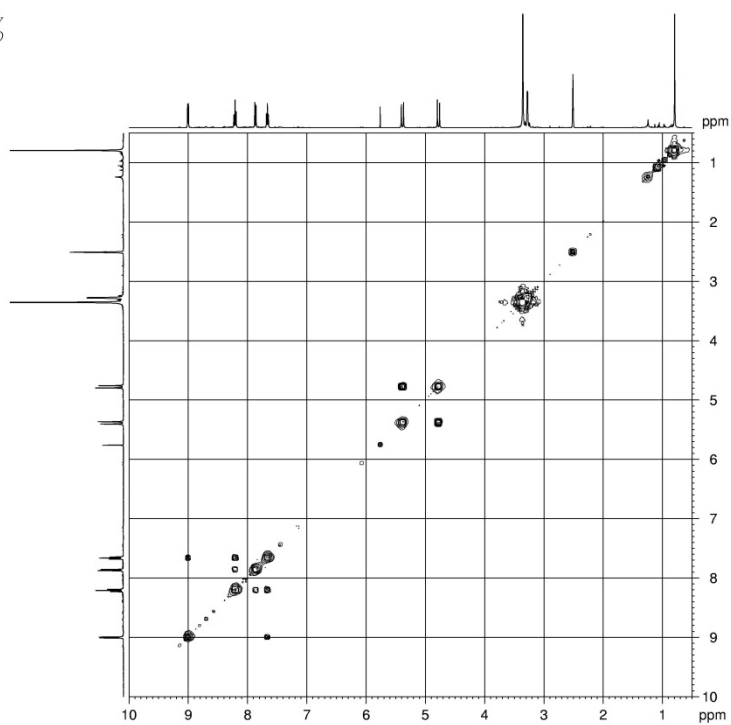

Supplement: c5ra01706h1.pdf [file c5ra01706h1.pdf]
